# Supplementary material for: Cancer Progression Mediated by Horizontal Gene Transfer in an In Vivo Model
Source: PubMed Central journal article supplement (PMC3532306; doi:10.1371/journal.pone.0052754), 2012-12-28

**SUPPL. FIGURE 5**

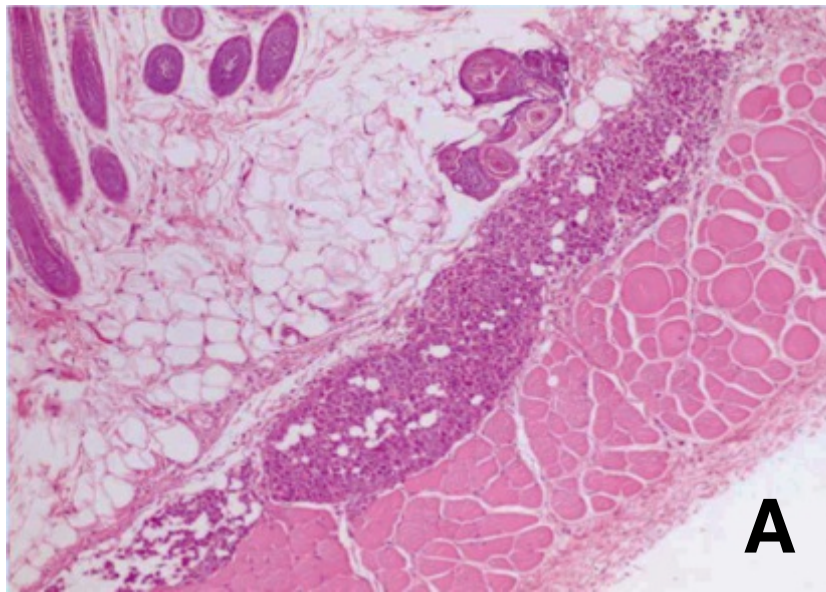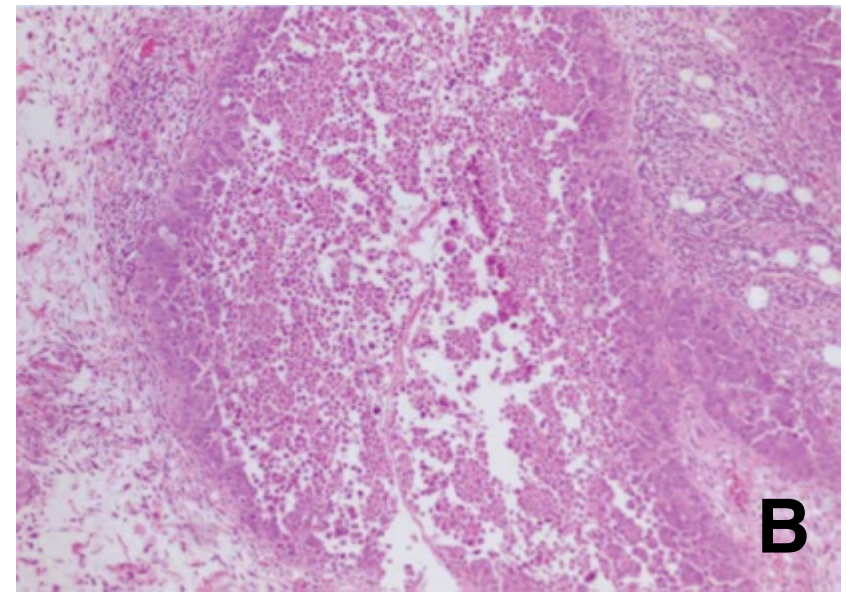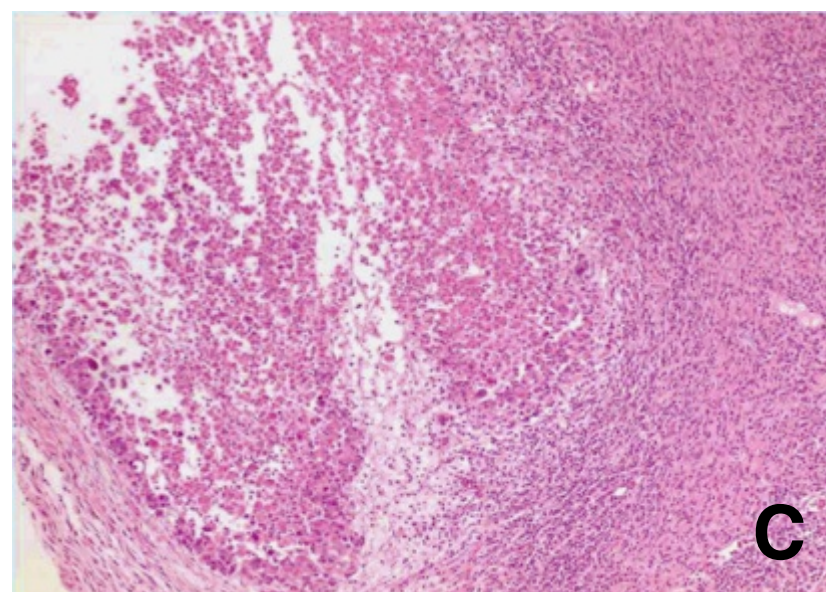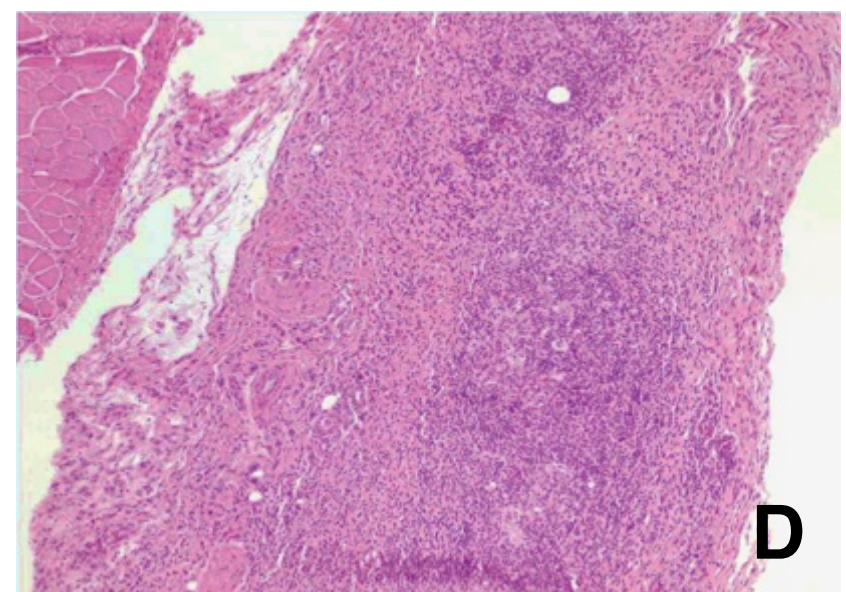

Supplement: pone.0052754.s005.pdf [file pone.0052754.s005.pdf]
